# Supplementary material for: Individualised prediction of major bleeding in patients with atrial fibrillation treated with anticoagulation
Source: PubMed Central journal article supplement (PMC11563370; doi:10.1371/journal.pone.0312294), 2024-11-14
Supplement: pone.0312294.s001.pdf [file pone.0312294.s001.pdf]

ATC = Anatomical Therapeutic Chemical Classification System

ICD8 = The International Classification of Diseases system, 8th revision

ICD10 = The International Classification of Diseases system, 10th revision

NOMESCO = The Nordic Medical Statistics Committees Classification of Surgical Procedures

|                                                                                                                              |                                                                                                                                                                                                                                                                           |
|------------------------------------------------------------------------------------------------------------------------------|---------------------------------------------------------------------------------------------------------------------------------------------------------------------------------------------------------------------------------------------------------------------------|
| <b>Atrial fibrillation or flutter</b>                                                                                        | <b>ICD8:</b> 42793, 42794<br><b>ICD10:</b> DI48                                                                                                                                                                                                                           |
| <b>Valvular atrial fibrillation:</b><br><i>(Rheumatic affection of the valves,<br/>Artificial valve, valvular operation)</i> | <b>ICD8:</b> 39400, 39401, 39402, 39408, 39409, 39500, 39501, 39502,<br>39508, 39509, 39600, 39601, 39602, 39603, 39604, 39608, 39609,<br>99751<br><b>ICD10:</b> DI05-06, DI080A, DI081A, DI082A, DI083A, DZ952, DZ954<br><b>NCSP:</b> KFKD, KFKH, KFMD, KFMH, KFGE, KFJF |
| <b>Anticoagulants</b>                                                                                                        |                                                                                                                                                                                                                                                                           |
| <b>Vitamin K antagonist</b>                                                                                                  | <b>ATC:</b> B01AA                                                                                                                                                                                                                                                         |
| <b>Direct oral anticoagulant</b><br><i>(Rivaroxaban, Apixaban,<br/>Dabigatran)</i>                                           | <b>ATC:</b> B01AF01, B01AF02,<br>B01AE07                                                                                                                                                                                                                                  |
| <b>Major bleeding</b>                                                                                                        |                                                                                                                                                                                                                                                                           |
| <b>Intracranial bleeding (ICH)</b>                                                                                           | <b>ICD10:</b> DI60-DI62, DS064-066,                                                                                                                                                                                                                                       |
| <b>Gastrointestinal bleeding (GI)</b>                                                                                        | <b>ICD10:</b> DI850, DK250, DK252, DK254, DK256, DK260, DK262,<br>DK264, DK266, DK270, DK272, DK274, DK276, DK280, DK282,<br>DK284, DK286, DK290, DK625, DK661, DK920, DK921, DK922,<br>DK228F, DK298A, DK638B, DK638C, DK838F, DK868G, DI864A                            |
|                                                                                                                              |                                                                                                                                                                                                                                                                           |
| Respiratory tract bleeding                                                                                                   | <b>ICD10:</b> DR04, DJ942                                                                                                                                                                                                                                                 |
| Ocular bleeding                                                                                                              | <b>ICD10:</b> DH31, DH356, DH431, DH450, DH052A                                                                                                                                                                                                                           |

|                                                                    |                                                                                                                                                                                                                                                                                                                                                                                                                                                                                                                                                                                              |
|--------------------------------------------------------------------|----------------------------------------------------------------------------------------------------------------------------------------------------------------------------------------------------------------------------------------------------------------------------------------------------------------------------------------------------------------------------------------------------------------------------------------------------------------------------------------------------------------------------------------------------------------------------------------------|
| Retroperitoneal bleeding                                           | <b>ICD10:</b> DS368D                                                                                                                                                                                                                                                                                                                                                                                                                                                                                                                                                                         |
| Intraspinal bleeding                                               | <b>ICD10:</b> DG951A                                                                                                                                                                                                                                                                                                                                                                                                                                                                                                                                                                         |
| Pericardial bleeding                                               | <b>ICD10:</b> DI312                                                                                                                                                                                                                                                                                                                                                                                                                                                                                                                                                                          |
| Articular bleeding                                                 | <b>ICD10:DM250</b>                                                                                                                                                                                                                                                                                                                                                                                                                                                                                                                                                                           |
| Muscular bleeding (compartment syndrome)                           | <b>ICD10:DT796</b>                                                                                                                                                                                                                                                                                                                                                                                                                                                                                                                                                                           |
| Anaemia                                                            | <b>ICD10:</b> DD62, DD500                                                                                                                                                                                                                                                                                                                                                                                                                                                                                                                                                                    |
| <b>Hypertension</b> ( <i>diagnosis and/or defining treatment</i> ) | <p><b>ICD8:</b> 40009, 40019, 40029, 40039, 40099, 40199, 40299, 40399, 40499</p> <p><b>ICD10:</b> DI10-15</p> <p><b>ATC:</b></p> <p>Antiadrenergic: C02A, C02B, C02C</p> <p>Diuretics (DIU): C02DA, C03A, C03B, C03D, C03E, C03X</p> <p>Vaso: C02DB, C02DD, C02DG</p> <p>Beta blockers (BB): C07A</p> <p>Calcium channel blockers (CCB): C08</p> <p>Renin Angiotensin System inhibitors (RAS):<br/>C09AA, C09XA02, C09CA</p> <p>BB + DIU: C07B, C07C, C07D, C07F</p> <p>CCB + DIU: C08G</p> <p>RAS + DIU: C09BA, C09DA, C09XA52</p> <p>Other + DIU: C02L</p> <p>RAS + CCB: C09BB, C09DB</p> |
| <b>Abnormal renal or hepatic function</b>                          |                                                                                                                                                                                                                                                                                                                                                                                                                                                                                                                                                                                              |
| Chronic kidney disease (CKD)                                       | <b>ICD8:</b> 582, 583,24902, 25002, 58499, 59009, 59320, 75310, 75311, 75319, 79299, 40399, 40499, 44609, 44629                                                                                                                                                                                                                                                                                                                                                                                                                                                                              |

|                                                                                            |                                                                                                                                                                                                                                                                                                                                                         |
|--------------------------------------------------------------------------------------------|---------------------------------------------------------------------------------------------------------------------------------------------------------------------------------------------------------------------------------------------------------------------------------------------------------------------------------------------------------|
|                                                                                            | <p><b>ICD10:</b> DN02, DN03, DN04, DN05, DN06, DN07, DN08, DN11, DN12, DN14, DN16, DN18, DN19, DN25, DN26, DN158, DN159, DQ612, DQ613, DQ615, DQ619, DE102, DE112, DE142, DI120, DM300, DN313, DM319, DM321</p>                                                                                                                                         |
| Liver disease                                                                              | <p><b>ICD8:</b> 15509, 15519, 15589, 45600, 45601, 57109, 57110, 57111, 57119, 57190, 57191, 57192, 57193, 57194, 57199, 57200, 57201, 57209, 57300, 57301, 57302, 57303, 57304, 57305, 57309</p> <p><b>ICD10:</b> DB18, DK71, DK72, DK73, DK74, DK75, DK76, DC22, DK70, DK77, DB942, DT864, DZ944, DD684, DI982, DQ618A</p>                            |
| <b>Stroke</b> (includes Transient Cerebral Ischaemia and arterial embolism and thrombosis) | <p><b>ICD8:</b> 43309, 43399, 43409, 43499, 43600, 43601, 43609, 43690, 43699, 43700, 43701, 43708, 43709, 43790, 43791, 43798, 43799, 43809, 43899, 43509, 43599, 44400, 44408, 44409, 44419, 44420, 44421, 44428, 44429, 44439, 44440, 44441, 44442, 44443, 44444, 44448, 44449, 44490, 44499</p> <p><b>ICD10:</b> DI63, DI64, DG458, DG459, DI74</p> |
| <b>Drugs</b>                                                                               |                                                                                                                                                                                                                                                                                                                                                         |
| NSAIDs                                                                                     | <b>ATC:</b> M01A (excl M01AX05)                                                                                                                                                                                                                                                                                                                         |
| Antiplatelets                                                                              | <b>ATC:</b> B01AC06, N02BA01, B01AC04, B01AC22, B01AC24, B01AC07                                                                                                                                                                                                                                                                                        |
| Alcohol                                                                                    | <p><b>ICD8:</b> 979, 980, 291, 303, 57109, 57110, 57710, E8609</p> <p><b>ICD10:</b> DF10, DK70, DE52, DT51, DE244, DG312, DG621, DG721, DI426, DK292, DK852, DK860, DO354, DR780, DZ502, DZ714, DZ721, DL278A, DT500A, DZ721A, DZ721B</p>                                                                                                               |
| <b>Heart failure</b> ( <i>Diagnosis and/or defining treatment</i> )                        | <p><b>ICD8:</b> 425, 4270, 4271</p> <p><b>ICD10:</b> DI110, DI42, DI50, DJ819</p> <p><b>ATC:</b> C03C, C03EB</p>                                                                                                                                                                                                                                        |

|                                                                                         |                                                                                                                                                                        |
|-----------------------------------------------------------------------------------------|------------------------------------------------------------------------------------------------------------------------------------------------------------------------|
| <b>Diabetes Mellitus</b> , type I and II ( <i>Diagnosis and/or defining treatment</i> ) | <b>ICD8:</b> 250<br><b>ICD10:</b> DE10-14<br><b>ATC:</b> A10                                                                                                           |
| <b>Vascular disease</b>                                                                 | <b>ICD8:</b> 44009, 44019, 44020, 44021, 44028, 44029, 44030, 44039, 44099, 410, 41109, 41199, 41209, 41299, 41309, 41399, 41409, 41499<br><b>ICD10:</b> DI70, DI21-25 |
