# Supplementary material for: Individualised prediction of major bleeding in patients with atrial fibrillation treated with anticoagulation
Source: PubMed Central journal article supplement (PMC11563370; doi:10.1371/journal.pone.0312294), 2024-11-14
Supplement: pone.0312294.s002.pdf [file pone.0312294.s002.pdf]

| Factor                          | Odds ratio | 95% CI        |
|---------------------------------|------------|---------------|
| (Intercept)                     | 0          | [-8.29;-5.41] |
| bleeding                        | 29.52      | [-0.32;7.09]  |
| stroke                          | 0.94       | [-0.18;0.06]  |
| ckd                             | 1.78       | [0.40;0.76]   |
| liver                           | 2.05       | [0.38;1.06]   |
| rcs(age)age                     | 1.04       | [0.01;0.06]   |
| rcs(age)age'                    | 1.03       | [-0.05;0.11]  |
| rcs(age)age''                   | 0.89       | [-0.64;0.41]  |
| rcs(age)age'''                  | 0.92       | [-1.06;0.88]  |
| hypertension                    | 1.17       | [0.06;0.26]   |
| drugs                           | 1.59       | [0.37;0.56]   |
| rcs(year2000)year2000           | 1.02       | [-0.02;0.06]  |
| rcs(year2000)year2000'          | 1          | [-0.12;0.12]  |
| rcs(year2000)year2000''         | 0.73       | [-0.83;0.21]  |
| rcs(year2000)year2000'''        | 4.65       | [-0.14;3.21]  |
| bleeding:stroke                 | 1.14       | [-0.18;0.43]  |
| bleeding:ckd                    | 1.05       | [-0.33;0.44]  |
| bleeding:liver                  | 0.56       | [-1.32;0.17]  |
| bleeding:rcs(age)age            | 0.97       | [-0.09;0.03]  |
| bleeding:rcs(age)age'           | 1          | [-0.21;0.21]  |
| bleeding:rcs(age)age''          | 0.88       | [-1.57;1.32]  |
| bleeding:rcs(age)age'''         | 1.77       | [-2.11;3.25]  |
| bleeding:hypertension           | 0.88       | [-0.42;0.17]  |
| bleeding:drugs                  | 0.78       | [-0.52;0.01]  |
| bleeding:rcs(year2000)year2000  | 1          | [-0.12;0.12]  |
| bleeding:rcs(year2000)year2000' | 0.89       | [-0.48;0.26]  |

|                                   |      |              |
|-----------------------------------|------|--------------|
| bleeding:rcs(year2000)year2000''  | 2.27 | [-0.74;2.38] |
| bleeding:rcs(year2000)year2000''' | 0.02 | [-8.78;0.78] |
