# Supplementary material for: Individualised prediction of major bleeding in patients with atrial fibrillation treated with anticoagulation
Source: PubMed Central journal article supplement (PMC11563370; doi:10.1371/journal.pone.0312294), 2024-11-14
Supplement: pone.0312294.s003.pdf [file pone.0312294.s003.pdf]

| Variable                 | Level  | HAS-BLED = 0<br>(n= 4,244) | HAS-BLED = 1-2<br>(n=46,855) | HAS-BLED >2<br>(n=40,228) | Total (n=91,327) |
|--------------------------|--------|----------------------------|------------------------------|---------------------------|------------------|
| Age                      | 20-49  | 1,050 (24.7)               | 1,489 (3.2)                  | 149 (0.4)                 | 2,688 (2.9)      |
|                          | 50-64  | 3,194 (75.3)               | 11,559 (24.7)                | 1,685 (4.2)               | 16,438 (18.0)    |
|                          | 65-74  | 0 (0.0)                    | 14,808 (31.6)                | 14,349 (35.7)             | 29,157 (31.9)    |
|                          | 75-100 | 0 (0.0)                    | 18,999 (40.5)                | 24,045 (59.8)             | 43,044 (47.1)    |
| Female                   | yes    | 1,019 (24.0)               | 20,856 (44.5)                | 19,234 (47.8)             | 41,109 (45.0)    |
| Congestive heart failure | yes    | 719 (16.9)                 | 19,093 (40.7)                | 20,882 (51.9)             | 40,694 (44.6)    |
| Hypertension             | yes    | 0 (0.0)                    | 25,034 (53.4)                | 37,048 (92.1)             | 62,082 (68.0)    |
| Diabetes                 | yes    | 180 (4.2)                  | 4,756 (10.2)                 | 8,050 (20.0)              | 12,986 (14.2)    |
| Previous stroke          | yes    | 0 (0.0)                    | 2,168 (4.6)                  | 12,097 (30.1)             | 14,265 (15.6)    |
| Vascular disease         | yes    | 47 (1.1)                   | 2,923 (6.2)                  | 7,208 (17.9)              | 10,178 (11.1)    |
| Abnormal renal function  | yes    | 0 (0.0)                    | 354 (0.8)                    | 3,423 (8.5)               | 3,777 (4.1)      |
| Abnormal liver function  | yes    | 0 (0.0)                    | 167 (0.4)                    | 871 (2.2)                 | 1,038 (1.1)      |
| Previous major bleeding  | yes    | 0 (0.0)                    | 844 (1.8)                    | 5,171 (12.9)              | 6,015 (6.6)      |

| Variable              | Level                     | HAS-BLED = 0<br>(n= 4,244) | HAS-BLED = 1-2<br>(n=46,855) | HAS-BLED >2<br>(n=40,228) | Total (n=91,327) |
|-----------------------|---------------------------|----------------------------|------------------------------|---------------------------|------------------|
| Drug consumption      | yes                       | 0 (0.0)                    | 13,977 (29.8)                | 36,261 (90.1)             | 50,238 (55.0)    |
| Alcohol abuse         | yes                       | 0 (0.0)                    | 638 (1.4)                    | 1,775 (4.4)               | 2,413 (2.6)      |
| Type of anticoagulant | Vitamin K antagonist      | 2,794 (65.8)               | 28,258 (60.3)                | 24,820 (61.7)             | 55,872 (61.2)    |
|                       | Direct oral anticoagulant | 1,401 (33.0)               | 17,997 (38.4)                | 14,828 (36.9)             | 34,226 (37.5)    |
|                       | Indeterminable            | 49 (1.2)                   | 600 (1.3)                    | 580 (1.4)                 | 1,229 (1.3)      |
| CHA2DS2VASc score     | 0                         | 2,599 (61.2)               | 1,160 (2.5)                  | 6 (0.0)                   | 3,765 (4.1)      |
|                       | 1                         | 1,338 (31.5)               | 6,594 (14.1)                 | 214 (0.5)                 | 8,146 (8.9)      |
|                       | >=2                       | 307 (7.2)                  | 39,101 (83.5)                | 40,008 (99.5)             | 79,416 (87.0)    |
