# Supplementary material for: Individualised prediction of major bleeding in patients with atrial fibrillation treated with anticoagulation
Source: PubMed Central journal article supplement (PMC11563370; doi:10.1371/journal.pone.0312294), 2024-11-14
Supplement: pone.0312294.s004.pdf [file pone.0312294.s004.pdf]

---

|                              | HAS-BLED = 0 | HAS-BLED = 1-2 | HAS-BLED = >2 | Total |
|------------------------------|--------------|----------------|---------------|-------|
| Major bleeding               | 5.25         | 22.33          | 41.75         | 29.86 |
| Gastrointestinal<br>bleeding | 2.38         | 10.93          | 21.49         | 15.08 |
| Intracranial<br>bleeding     | 1.19         | 4.77           | 8.49          | 6.20  |
| Stroke                       | 6.21         | 19.69          | 52.59         | 33.19 |
| Death                        | 14.01        | 69.23          | 122.33        | 89.53 |

---
